# Supplementary material
Source: PubMed Central journal article supplement (PMC2889534)
Supplement: 0910414107_pnas.0910414107_SI.pdf [file 0910414107_pnas.0910414107_SI.pdf]

# Supporting Information

Mocenni et al. 10.1073/pnas.0910414107

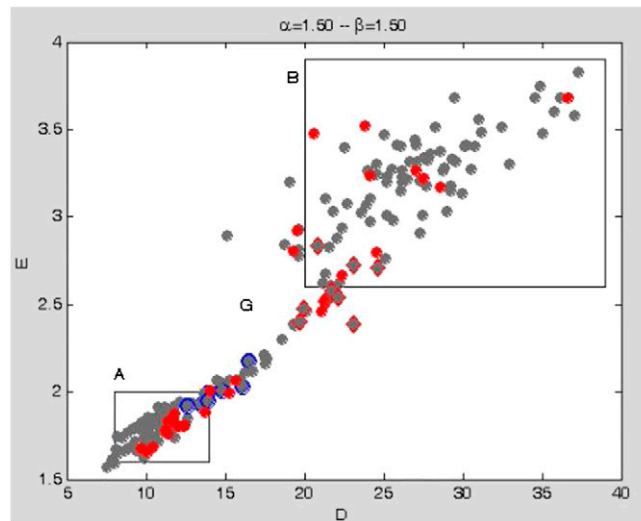

**Movie S1.** Movie S1 shows the dynamics of the points in the  $D$ - $E$  diagram for  $\alpha \in [-1.5, 1.5]$  and  $\beta \in [-1.5, 1.5]$ . Each group of red points describes the values of  $D$  and  $E$  for a fixed value of parameter  $\alpha$  and increasing values of parameter  $\beta$ . A change of the system's dynamics corresponds to the fact that, when the parameter  $\beta$  is varied, a point in the  $D$ - $E$  diagram moves from region  $A$  toward region  $B$  or vice versa by crossing region  $G$ . The values of  $\beta$  for which such crossing takes place are reported in Fig. 5 with red diamonds and blue circles.

[Movie S1 \(MOV\)](#)
